# Supplementary material for: Polycyclic aromatic polymer nanoparticles show potent infectious particle adsorption capability
Source: Royal Society of Chemistry journal article supplement (doi:10.1039/d4tb01793e), 2024-11-07
Supplement: d4tb01793e1.pdf [file d4tb01793e1.pdf]

*Supporting Information*

**Polycyclic aromatic polymer nanoparticles  
show potent infectious particle adsorption capability**

Yudai Oishi,<sup>a,‡</sup> Mako Toyoda,<sup>b,‡</sup> Nanami Hano,<sup>ac</sup> Chihiro Motozono,<sup>b</sup> Takamasa Ueno,<sup>b</sup>

Makoto Takafuji<sup>\*ac</sup>

<sup>a</sup> Faculty of Advanced Science and Technology, Kumamoto University, 2-39-1  
Kurokami, Chuo-ku, Kumamoto 860-8555, Japan.

<sup>b</sup> Division of Infection and Immunity, Joint Research Center for Human Retrovirus  
Infection, Kumamoto University, 2-2-1, Honjo, Chuo-ku, Kumamoto 860-0811,  
Japan.

<sup>c</sup> International Research Organization for Advanced Science and Technology  
(IROAST), Kumamoto University, 2-39-1 Kurokami, Chuo-ku, Kumamoto 860-8555  
Japan.

<sup>‡</sup>These authors contributed equally to this work.

\*Corresponding Author

Tel: +81 96 342 3661 Fax: +81 96 342 3662

E-mail: takafuji@kumamoto-u.ac.jp (M. Takafuji)

Table S1

Table S1 Preparation conditions and characterization of ArP nano particles\*

| Name  | Monomer 1         |            | Monomer 2         |            | Crosslinker       |            | Solvent <sup>b</sup>          | Reaction condition |            | Yield (%) | Size (nm) | CV (%) |
|-------|-------------------|------------|-------------------|------------|-------------------|------------|-------------------------------|--------------------|------------|-----------|-----------|--------|
|       | Type <sup>a</sup> | Conc. (mM) | Type <sup>a</sup> | Conc. (mM) | Type <sup>a</sup> | Conc. (mM) |                               | Time (h)           | Temp. (°C) |           |           |        |
| -     | 1,5-DHN           | 30         | -                 |            | TMTA              | 30         | EtOH/H <sub>2</sub> O (1 : 1) | 75                 | 6          | 75.1      | 867       | 14.5   |
| 15D   | 1,5-DHN           | 30         | -                 |            | TMTA              | 30         | EtOH/EG (7 : 3)               | 75                 | 6          | 80.1      | 448       | 7.9    |
| -     | 2,6-DHN           | 30         | -                 |            | TMTA              | 30         | EtOH/H <sub>2</sub> O (7 : 3) | 75                 | 24         | 13.6      | 331       | 29.9   |
| 26D   | 2,6-DHN           | 30         | -                 |            | TMTA              | 30         | EtOH/H <sub>2</sub> O (7 : 3) | 75                 | 72         | 33.8      | 481       | 31.8   |
| -     | 1,5-DHN           | 15         | PhCOOH            | 15         | TMTA              | 30         | EtOH                          | 75                 | 24         | 35.6      | 1677      | 3.9    |
| -     | 1,5-DHN           | 15         | PhCOOH            | 15         | TMTA              | 30         | EtOH/EG (7 : 3)               | 75                 | 24         | 32.2      | ~100      | -      |
| -     | 1,5-DHN           | 15         | PhCOOH            | 15         | TMTA              | 30         | 1-PrOH                        | 90                 | 24         | 37.1      | 840       | 7.9    |
| 15D-C | 1,5-DHN           | 15         | PhCOOH            | 15         | TMTA              | 30         | 1-BuOH                        | 110                | 24         | 33.3      | 617       | 4.6    |
| -     | 1,5-DHN           | 15         | PhNH <sub>2</sub> | 15         | TMTA              | 30         | EtOH                          | 75                 | 24         | 53.7      | 1395      | 9.7    |
| -     | 1,5-DHN           | 15         | PhNH <sub>2</sub> | 15         | TMTA              | 30         | EtOH/EG (7 : 3)               | 75                 | 24         | 51.5      | 369       | 8.2    |
| -     | 1,5-DHN           | 15         | PhNH <sub>2</sub> | 15         | TMTA              | 30         | 1-BuOH                        | 110                | 24         | 66.6      | 695       | 5.1    |
| 15D-N | 1,5-DHN           | 15         | PhNH <sub>2</sub> | 15         | TMTA              | 30         | 1-PrOH                        | 90                 | 24         | 57.1      | 667       | 5.0    |

<sup>a</sup>1,5-DHN: 1,5-dihydroxy naphthalene; 2,6-DHN: 2,6-dihydroxy naphthalene; PhCOOH: 3-hydroxybenzoic acid; PhNH<sub>2</sub>: 3-aminophenol; TMTA: 1,3,5-trimethyl-1,3,5-triazinane.

<sup>b</sup>EtOH: ethanol; EG: ethylene glycol; 1-BuOH: 1-butanol; 1-PrOH: 1-propanol. \*Gray marker indicates the optimized preparation conditions for virus adsorption experiments.

*Table S2***Table S2** The atomic percentage of C, N and O determined from XPS analysis

|         | C (%) | N (%) | O (%) |
|---------|-------|-------|-------|
| 15D-h   | 78.4  | 6.2   | 15.2  |
| 26D-h   | 81.9  | 5.2   | 12.8  |
| 15D-C-h | 79.7  | 7.8   | 12.1  |
| 15D-N-h | 75.1  | 10.6  | 14.2  |

*Table S3***Table S3** The atomic percentage of C, N and O determined from EDX analysis

|         | C (%) | N (%) | O (%) |
|---------|-------|-------|-------|
| 15D-h   | 80.6  | 6.0   | 13.4  |
| 26D-h   | 82.1  | 3.4   | 14.6  |
| 15D-C-h | 70.3  | 9.6   | 20.1  |
| 15D-N-h | 66.9  | 12.1  | 21.0  |

*Table S4***Table S4** Percentage composition of chemical bond from XPS N1s spectra

|         | Binding energy (eV) |                     |                         |
|---------|---------------------|---------------------|-------------------------|
|         | 399.7–399.9         | 400.9               | 401.3–401.9             |
|         | C-N-C (%)           | NH <sub>2</sub> (%) | (C) <sub>3</sub> -N (%) |
| 15D-h   | 59.3                | –                   | 40.7                    |
| 26D-h   | 60.9                | –                   | 39.1                    |
| 15D-C-h | 79.2                | –                   | 20.8                    |
| 15D-N-h | 73.0                | 13.2                | 13.8                    |

*Table S5***Table S5** Percentage composition of chemical bond from XPS O1s spectra

|         | Binding energy (eV) |             |             |
|---------|---------------------|-------------|-------------|
|         | 530.6–531.2         | 532.5–532.9 | 535.0–535.3 |
|         | C=O (%)             | C-O (%)     | H-O-H (%)   |
| 15D-h   | 28.3                | 68.9        | 2.8         |
| 26D-h   | 26.6                | 72.0        | 1.4         |
| 15D-C-h | 31.1                | 66.4        | 2.5         |
| 15D-N-h | 35.8                | 61.7        | 2.5         |

Table S6

**Table S6** Zeta potential (N=3) of ArP nanoparticles dispersed in 20 mM HEPES buffer (pH 7.5) at 25°C.

|                     | 15D-h | 26D-h | 15D-C-h | 15D-N-h |
|---------------------|-------|-------|---------|---------|
| Zeta potential (mV) | -36.4 | -31.6 | -35.3   | -35.0   |
| Zeta deviation (mV) | 4.13  | 5.71  | 4.34    | 4.47    |

Figure S1

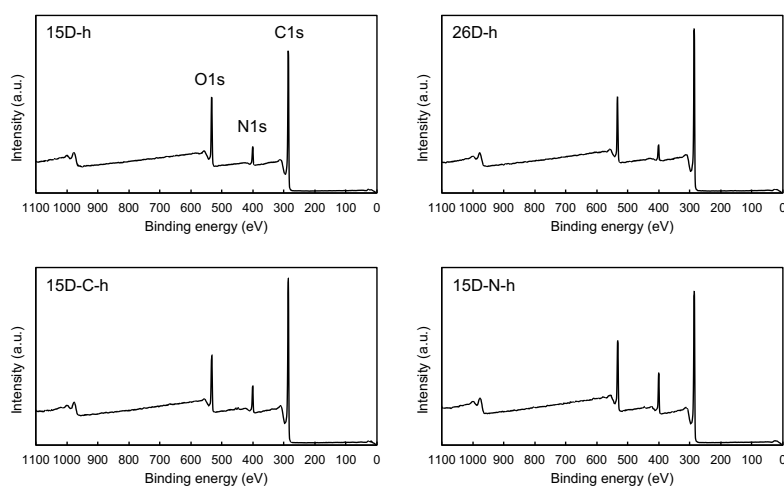

**Fig. S1** XPS survey spectra of ArP nanoparticles.

Figure S2

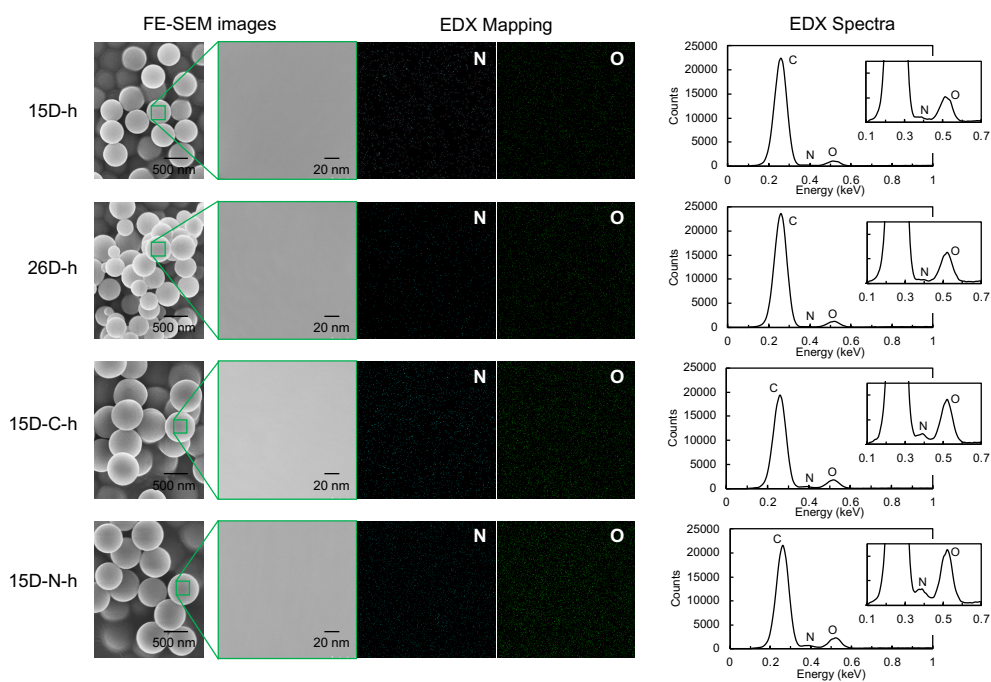

**Fig. S2** EDX mapping and spectra of ArP nanoparticles.

Figure S3

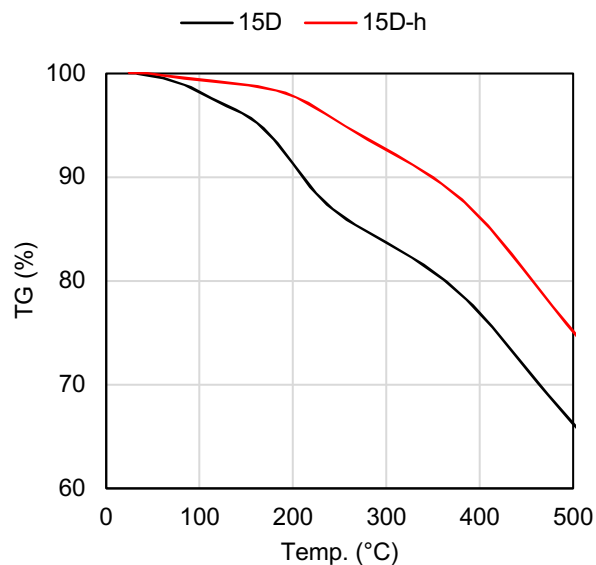

Fig. S3 TGA results of 15D and 15D-h. (Heating rate: 5°C/min, under 200 mL/min N<sub>2</sub> gas flow)

Figure S4

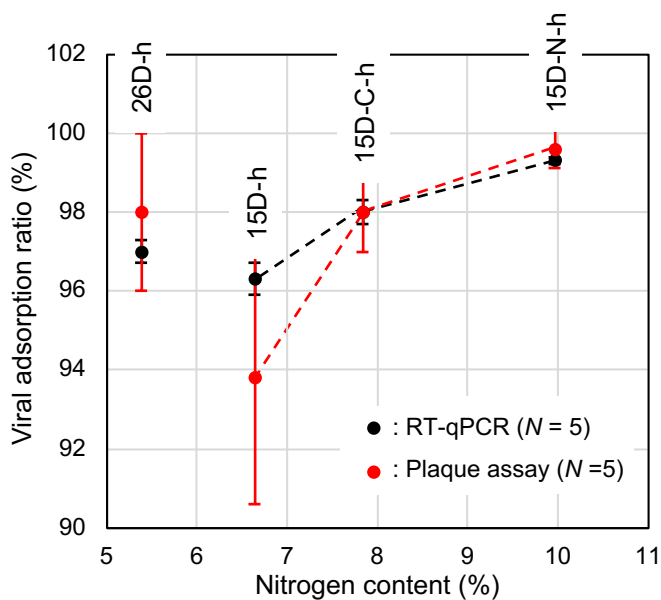

Fig. S4 Relationship between nitrogen contents and viral adsorption ratios determined by RT-qPCR ( $N = 5$ ) and plaque assay ( $N = 5$ ). The initial viral titre of viral adsorption experiment is 40,000 PFU/mL. The nitrogen content was determined by elemental analysis. The error bar represents standard deviation.
